# Supplementary material
Source: publisher site journal article supplement (https://www.dovepress.com/article/580772)
Supplement: Supplementary file 1 [file 580772%20Revised%20Supplementary%20Tables%20S1-S6.docx]

**Table S1. Primary Antibodies Information**

| **Name** | **Brands** | **Dilution Ratio** |
| --- | --- | --- |
| GAPDH | 60004-1-Ig, Proteintech, China | 1:2000 |
| Bcl2 | 68103-1-Ig, Proteintech, China | 1:1000 |
| Bax | 60267-1-Ig, Proteintech, China | 1:1000 |
| C-caspase3 | 25128-1-AP, Proteintech, China | 1:1000 |
| STAT1 | sc-464, Santa cruz, USA | 1:200 |
| p-STAT1 | sc-8394, Santa cruz, USA | 1:200 |
| NF-κB | 610868, BDBiosciences, USA | 1:1500 |
| Nrf2 | BF8017, Affinity, USA | 1:1000 |
| GPX4 | 67763-1-Ig, Proteintech, China | 1:1000 |

**Table S2. The sequences of RT-PCR primers**

| Gene | Forward sequences | Reverse sequences |
| --- | --- | --- |
| STAT1 | 5’- ACAGTAGGCAAGGAAGGGGTC -3’ | 5’- GCTCTGGTTGTCTGCTATGC -3’ |
| GPX4 | 5’- TTCACTGTAGCCTTG GCTGA -3’ | 5’- AGGTCACCCAAGTACTCGTG -3’ |
| Nrf2 | 5’- GGGtGGGTGTTGGATGTAGA -3’ | 5’- AAGTCAGCCTCTCGTTCCAA -3’ |
| GAPDH | 5’- AGGTCGGTGTGAACGGATTTG -3’ | 5'- TGTAGACCATGTAGTTGAGGTCA-3’ |

**Table S3. The sequences of si-RNAs**

| Name | Forward sequences | Reverse sequences |
| --- | --- | --- |
| si-control | 5’- UUCUCCGAACGUGUCACGU -3’ | 5’- ACGUGACACGUUCGGAGAA -3’ |
| hsa-STAT1-1 | 5’- UAUAUUUUCCUUACAAAACCU -3’ | 5’- GUUUUGUAAGGAAAAUAUAAA -3’ |
| hsa-STAT1-2 | 5’- AAAACUGUCAUCAUAAAGCUG -3’ | 5’- GCUUUAUGAUGACAGUUUUCC -3’ |
| hsa-STAT1-3 | 5’- UGCUUUUCCUUAUGUUAUGCU -3’ | 5'- CAUAACAUAAGGAAAAGCAAG -3’ |

**Table S4. The promoter sequence of NRF2**

| NM_010902 (Nrf2)-promoter |
| --- |
| AAACGTGCTGCTTCTACGCAAACTACTAAGCAAACTATTCAGTTTGGTTTGGCATCACAGAGAGAGGGAAAAGGCCCCTACAAGGAGGAAGTAAAAGCCTCCCATTTCCTTTTCTCAGGTTCTTCCTGGCTAGTAACTCTGCTTTCAGTTGTCACAAGGCCCTTAAGCTCTCCTGCCGACAGAGGTTGGCCCCTGCAGCATTAATACTATGAAAATATGTTATGAGCTAATTTATGTTTAAAAGTTTAAATTTTCGCGGTGCTCCAGAGAAACTGTAAGGCAACTTATAGCTTCAAATGTTAAAAGCCGTTAAGGGTTAAAATTTTTTTACTGCTGTTTCTGTTTTGCTGGAGAAGGGAGATTCTGTTTGCATTCTGTTTGTGAGAGAACAAATGGCTGAGCATTGCATTCAGAAGTCCTGAGTCTCAGCTGGAGACCTAGCGCTAGGATCTGAGTAAGAGACCTTTCTTTGTCAGATTGTTGAATCTCTAACTGACCCCAGGCCCATAAATAGGGTAGTGGTTTTTAAAATACATTTCAAGCCAGGGCAGTGGTGGCGCAAACGTTAGCCCCAGCTACTAGGGAGGAGTAGGCAGCAGCAGTTGGCTGACTTCTTCCAGCCCTGGTCACTGGAGTGGCTGAGTCAGACGACCATAGCTCAGACAGAAAAAACCCTGTCTTAAAAAAACCAAAAAAAAAAAAAATTCAAAAGAAGATATTTGTGTTTCAAACATACTTAAAACAACAAAAGAGAAAGATAAAAAATACTCTGGGTTTTTCAACTATTAACACATTTAAAACATCCCTGGATTTTTTTTCTAAGCCCATTAACTATTTTAGAAATTGGATTTTTTTTCGGGGGCAGTTAAAGAAGTATGTTTGGGAATGAACGTTGTGAAAAACAGTCACTACCACCACCACCACCACCAAACCCCATGTGCAGAGTTTATGGTACCGTTCTCAGCCTGTGAGAGAGCCACCCCAAGCAGTCCAGATATCTGTCATACATATACTTACACTTACAAGTTGATTCTGACAAAAATTAGTTATGAAGTAGCAGCAAAAAATACTTTTTCTAGTTGGAGTCACCACAACACGAACTATATTAAAGGGTCGCTGCATTACGACGGTTGAGAAACGCTGCTCTAAAAAACAGCTTGAGAGGTGGGGCCTTATGAGATCATACCTCCAAAATTCCCAAAATAGAGTAAGTACGTGTAAAGGAACCCTGAGAGTTCTAGAAATCCACTTCGGTGATTCAGTTAGAGCTGTGGCCCGTTGCTGGGCTCTGGGTGGATGAAGTGGACTGGTGTACCGCTTGCCCCCAGGCCAGGTCGTGGGCAGAAGTGAGAGGCCTTCGAGTAAGGAGCACCAGTTTCAGGGCACGTAGTCATCATCTCCCTGGGGGCAGAGGTGTTGAGCACCAGCAACTGAATGGGACCTGGGGCCCAGAGGGCAGTTGGCCTCTTGCAAAGTCCGGGTCCCAGCTCAGAGCCCTAAACCCCGAACTGGCGCCACAGTCAGCCGGTGGAGCGAGATAAAAGCGGGGCAAGGTTCTGCAGGTCCAAATCAGGGAGTGGCGAGCTCCGATAGCAGCGCACGGGCCGGGGCTCCCGGTGTGCTTGCACCAACTGTTTAAACTGCTTCAAAGAGCCAGGGTCTGACAGAGCCTTGGGCAAAGCCTGCTAATCTCTAGCAAGGGGCTGCTCCTGGCGACACAGTTCTGGGGCCCGAGAGCCAGGTCCTCTCGCGCTCCGCCCCCCGTGGCACTTCAGCCCACCTGACTCCGCCATGCCCCGGACAGCGAGAGGAGGATCAACAGTGGGGGGTCGAGGGGAAGCGGGAACTCCGGCCGGAAGCACTCAGGTCCATGCCCCGCCCTCGGGCTCTTGCTCCTTCCACTGGCCCCCGTTCTTGTCCCCCCTCCCCTTGCCCCGCCCTAGGCCTTTGCGGGGGGCCCTCGGGTCCTTGCCCTGCCCCTGTACGCGATTCCAAGCTCTTGCCCCGCCCCCTTACCCCGC |

**Table S5. The binding site promoter sequence of NRF2**

| Name | Sequences |
| --- | --- |
| Site 1 | TTTGGTTTGGCATCACAGAGAGAGGGAAAAGGCCCCTACAAGGAGGAAGTAAAAGCCTCCCATTTCCTTTTCTCAGGTTCTTCCTGGCTAGTAACTCTGCTTTCAGTTGTCACAAGGCCCTTAAGCTCTCCTGCCGAC |
| Site 2 | TCGCGGTGCTCCAGAGAAACTGTAAGGCAACTTATAGCTTCAAATGTTAAAAGCCGTTAAGGGTTAAAATTTTTTTACTGCTGTTTCTGTTTTGCTGGAGAAGGGAGATTCTGTTTGCATTCTGTTTGTGAGAGAACAAATGGCTGAGCATTGCATTCAGAAGTCCTGAGTCTCA |
| Site 3 | GGGCAGTTAAAGAAGTATGTTTGGGAATGAACGTTGTGAAAAACAGTCACTACCACCACCACCACCACCAAACCCCATGTGCAGAGTTTATGGTACCGTTCTCAGCCTGTGAGAGAGCCACCCCAAGCAGTCCAGATATCTGTCATACATATACTTACACTTACAAGTTGATTCTGACAAAAATTAGTTATGAAGTAGCAGCAAA |
| Site 4 | TAAACCCCGAACTGGCGCCACAGTCAGCCGGTGGAGCGAGATAAAAGCGGGGCAAGGTTCTGCAGGTCCAAATCAGGGAGTGGCGAGCTCCGATAGCAGCGCACGGGCCGGGGCTCCCGGTGTGCTTGCACCAACTGTTTAAACTGCTTCA |
| Site 5 | CCCCCGTGGCACTTCAGCCCACCTGACTCCGCCATGCCCCGGACAGCGAGAGGAGGATCAACAGTGGGGGGTCGAGGGGAAGCGGGAACTCCGGCCGGAAGCACTCAGGTCCATGCCCCGCCCTCGGGCTCTTGCTCCTTCCACTGGCCCCCGTTCTTGTC |

**Table S6****. qPCR primers for ChIP assays**

| **Name** | **Forward** | **Reverse** |
| --- | --- | --- |
| hsa-Nrf2-#1 | CACAGAGAGAGGGAAAAGGCCCCTA | TCTGCTTTCAGTTGTCACAAGGCCCTT |
| hsa-Nrf2-#2 | AGAGAAACTGTAAGGCAACTTATAGCTTCAA | GTTTGCATTCTGTTTGTGAGAGAACAAATG |
| hsa-Nrf2-#3 | GTTTGGGAATGAACGTTGTGAAAAACAGTC | ATACATATACTTACACTTACAAGTTGATTCTG |
| hsa-Nrf2-#4 | GAACTGGCGCCACAGTCAGCCGGTG | CAACTGTTTAAACTGCTTCAATAGAGCCAG |
| hsa-Nrf2-#5 | ACTTCAGCCCACCTGACTCCGCCAT | GGGCTCTTGCTCCTTCCACTGGCCCC |
